# Supplementary material for: Effect of Nardostachys jatamansi DC. on Apoptosis, Inflammation and Oxidative Stress Induced by Doxorubicin in Wistar Rats
Source: MDPI journal article supplement (doi:10.3390/plants9111579), 2020-11-15
Supplement: s1 [file s1]

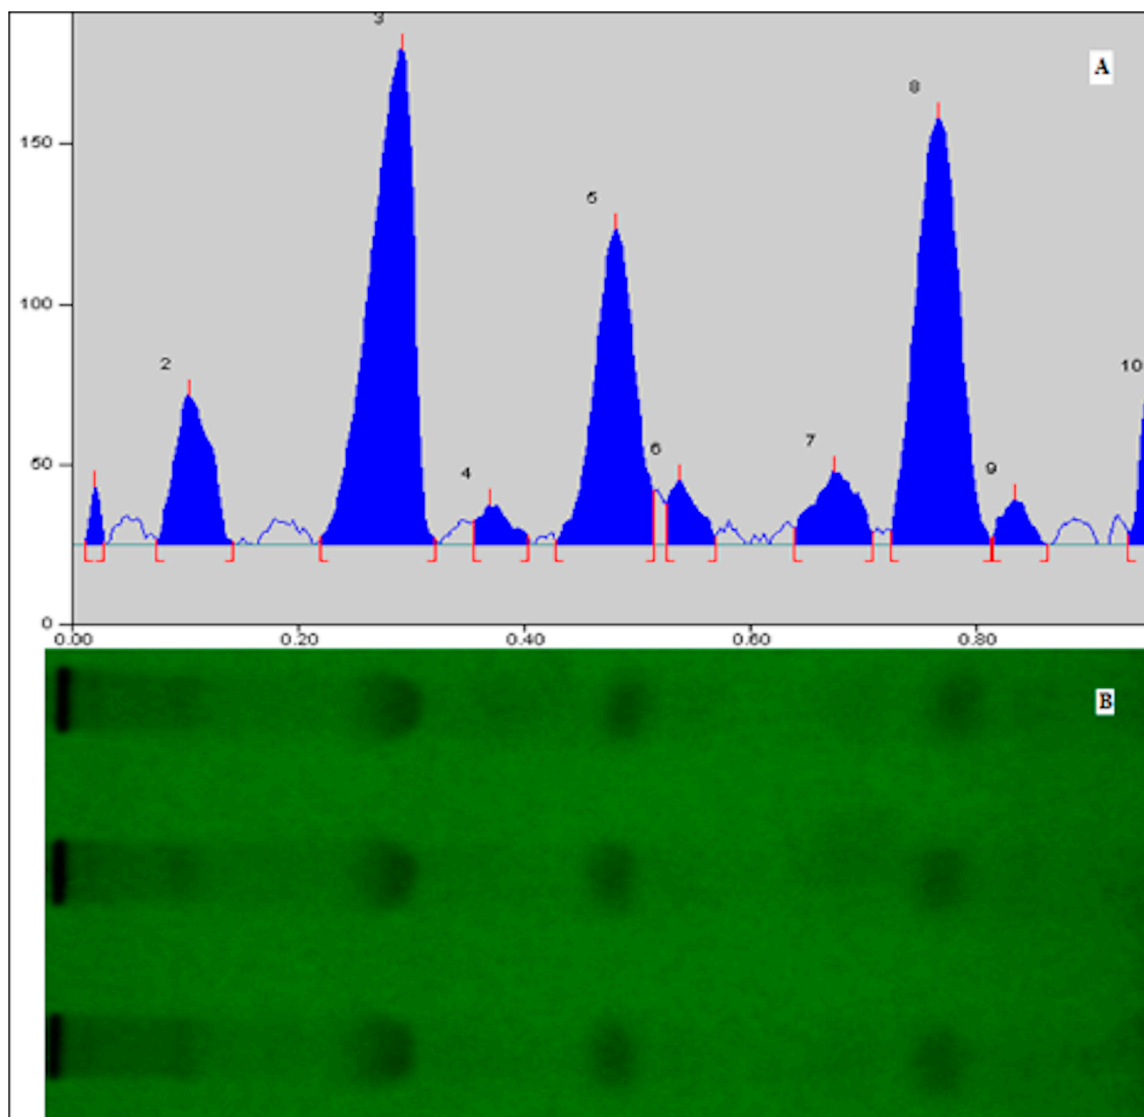

**Figure S1.** HPTLC chromatogram (A) and developed HPTLC plate (B) of MEJ showing corresponding spot and peaks at 254 nm.
